# Supplementary material for: Canalization and Control in Automata Networks: Body Segmentation in Drosophila melanogaster
Source: PLoS One. 2013 Mar 8;8(3):e55946. doi: 10.1371/journal.pone.0055946 (PMC3592869; doi:10.1371/journal.pone.0055946)
Supplement: Data S10 — Minimal configurations for the segment polarity network with the smallest number of nodes that need to be specified in a Boolean state. (CSV) [file pone.0055946.s010.csv]

SLP_1	wg_1	WG_1	en_1	EN_1	hh_1	HH_1	ptc_1	PTC_1	PH_1	SMO_1	ci_1	CI_1	CIA_1	CIR_1	SLP_2	wg_2	WG_2	en_2	EN_2	hh_2	HH_2	ptc_2	PTC_2	PH_2	SMO_2	ci_2	CI_2	CIA_2	CIR_2	SLP_3	wg_3	WG_3	en_3	EN_3	hh_3	HH_3	ptc_3	PTC_3	PH_3	SMO_3	ci_3	CI_3	CIA_3	CIR_3	SLP_4	wg_4	WG_4	en_4	EN_4
0	0	0	1	#	#	#	0	#	#	#	#	#	#	1	0	#	#	0	#	0	#	#	#	#	#	#	#	#	1	1	0	0	#	#	#	#	1	#	#	#	#	0	#	1	1	1	1	0	0
0	0	0	1	#	#	#	0	#	#	#	#	#	#	1	0	#	#	0	#	0	1	#	#	#	#	#	#	#	1	1	0	0	#	#	#	#	1	#	#	#	#	0	#	1	1	1	1	0	0
0	0	0	1	#	#	#	0	#	#	#	#	#	#	1	0	#	#	0	#	0	1	#	#	#	#	#	#	#	1	1	0	0	#	#	#	#	1	#	#	#	#	0	0	#	1	1	1	0	0
0	0	0	1	#	#	#	0	#	#	#	#	#	#	1	0	1	#	0	#	0	#	#	#	#	#	#	#	#	1	1	0	0	#	#	#	#	1	#	#	#	#	0	#	1	1	#	1	0	0
0	0	0	1	#	#	#	0	#	#	#	#	#	#	1	0	1	#	0	#	0	#	#	#	#	#	#	#	#	1	1	0	0	#	#	#	#	1	#	#	#	#	0	0	#	1	#	1	0	0
0	0	0	1	#	#	#	0	#	#	#	#	#	#	1	0	1	#	0	#	0	1	#	#	#	#	#	#	#	1	1	0	0	#	#	#	#	1	#	#	#	#	0	#	1	1	#	1	0	0
0	0	0	1	#	#	#	0	#	#	#	#	#	#	1	0	1	1	0	#	0	1	#	#	#	#	#	#	#	1	1	0	0	#	#	#	#	1	#	#	#	#	0	#	1	1	#	#	0	0
0	0	0	1	#	#	#	0	#	#	#	#	#	#	1	0	1	1	0	#	0	1	#	#	#	#	#	#	#	1	1	0	0	#	#	#	#	1	#	#	#	#	0	0	#	1	#	#	0	0
0	0	0	1	#	#	#	0	#	#	#	#	#	0	#	0	#	#	0	#	0	#	#	#	#	#	#	#	#	1	1	0	0	#	#	#	#	1	#	#	#	#	0	#	1	1	1	1	0	0
0	0	0	1	#	#	#	0	#	#	#	#	#	0	#	0	#	#	0	#	0	#	#	#	#	#	#	#	#	1	1	0	0	#	#	#	#	1	#	#	#	#	0	0	#	1	1	1	0	0
0	0	0	1	#	#	#	0	#	#	#	#	#	0	#	0	#	#	0	#	0	1	#	#	#	#	#	#	#	1	1	0	0	#	#	#	#	1	#	#	#	#	0	#	1	1	1	1	0	0
0	0	0	1	#	#	#	0	#	#	#	#	#	0	#	0	#	#	0	#	0	1	#	#	#	#	#	#	#	1	1	0	0	#	#	#	#	1	#	#	#	#	0	0	#	1	1	1	0	0
0	0	0	1	#	#	#	0	#	#	#	#	#	0	#	0	#	1	0	#	0	1	#	#	#	#	#	#	#	1	1	0	0	#	#	#	#	1	#	#	#	#	0	0	#	1	1	#	0	0
0	0	0	1	#	#	#	0	#	#	#	#	#	0	#	0	1	#	0	#	0	1	#	#	#	#	#	#	#	1	1	0	0	#	#	#	#	1	#	#	#	#	0	0	#	1	#	1	0	0
0	0	0	1	#	#	#	0	#	#	#	#	#	0	#	0	1	1	0	#	0	#	#	#	#	#	#	#	#	1	1	0	0	#	#	#	#	1	#	#	#	#	0	#	1	1	#	#	0	0
0	0	0	1	#	#	#	0	#	#	#	#	#	0	#	0	1	1	0	#	0	1	#	#	#	#	#	#	#	1	1	0	0	#	#	#	#	1	#	#	#	#	0	#	1	1	#	#	0	0
0	0	0	1	#	#	#	0	#	#	#	#	#	0	#	0	1	1	0	#	0	1	#	#	#	#	#	#	#	1	1	0	0	#	#	#	#	1	#	#	#	#	0	0	#	1	#	#	0	0
0	0	0	1	#	#	#	0	0	#	#	#	#	#	1	0	#	#	0	#	0	#	#	#	#	#	#	#	#	1	1	0	0	#	#	#	#	1	#	#	#	#	0	0	#	1	1	1	0	0
0	0	0	1	#	#	#	0	0	#	#	#	#	#	1	0	1	#	0	#	0	#	#	#	#	#	#	#	#	1	1	0	0	#	#	#	#	1	#	#	#	#	0	#	1	1	#	1	0	0
0	0	0	1	#	#	#	0	0	#	#	#	#	#	1	0	1	#	0	#	0	#	#	#	#	#	#	#	#	1	1	0	0	#	#	#	#	1	#	#	#	#	0	0	#	1	#	1	0	0
0	0	0	1	#	#	#	0	0	#	#	#	#	0	#	0	#	#	0	#	0	#	#	#	#	#	#	#	#	1	1	0	0	#	#	#	#	1	#	#	#	#	0	#	1	1	1	1	0	0
0	0	0	1	#	#	#	0	0	#	#	#	#	0	#	0	#	#	0	#	0	#	#	#	#	#	#	#	#	1	1	0	0	#	#	#	#	1	#	#	#	#	0	0	#	1	1	1	0	0
0	0	0	1	#	#	#	0	0	#	#	#	#	0	#	0	#	1	0	#	0	#	#	#	#	#	#	#	#	1	1	0	0	#	#	#	#	1	#	#	#	#	0	#	1	1	1	#	0	0
0	0	0	1	#	#	#	0	0	#	#	#	#	0	#	0	#	1	0	#	0	#	#	#	#	#	#	#	#	1	1	0	0	#	#	#	#	1	#	#	#	#	0	0	#	1	1	#	0	0
0	0	0	1	#	#	#	0	0	#	#	#	#	0	#	0	1	#	0	#	0	#	#	#	#	#	#	#	#	1	1	0	0	#	#	#	#	1	#	#	#	#	0	0	#	1	#	1	0	0
0	0	0	1	#	#	#	0	0	#	#	#	#	0	#	0	1	1	0	#	0	#	#	#	#	#	#	#	#	1	1	0	0	#	#	#	#	1	#	#	#	#	0	0	#	1	#	#	0	0
0	0	0	1	1	#	#	0	#	#	#	#	#	#	#	0	1	1	0	#	0	#	#	#	#	#	#	#	#	1	1	0	0	#	#	#	#	1	#	#	#	#	0	#	1	1	#	#	0	0
0	0	0	1	1	#	#	0	#	#	#	#	#	#	#	0	1	1	0	#	0	1	#	#	#	#	#	#	#	1	1	0	0	#	#	#	#	1	#	#	#	#	0	#	1	1	#	#	0	0
0	0	0	1	1	#	#	0	0	#	#	#	#	#	#	0	#	#	0	#	0	#	#	#	#	#	#	#	#	1	1	0	0	#	#	#	#	1	#	#	#	#	0	0	#	1	1	1	0	0
0	0	0	1	1	#	#	0	0	#	#	#	#	#	#	0	#	1	0	#	0	#	#	#	#	#	#	#	#	1	1	0	0	#	#	#	#	1	#	#	#	#	0	#	1	1	1	#	0	0
0	0	0	1	1	#	#	0	0	#	#	#	#	#	#	0	1	#	0	#	0	#	#	#	#	#	#	#	#	1	1	0	0	#	#	#	#	1	#	#	#	#	0	0	#	1	#	1	0	0
0	0	0	1	1	#	#	0	0	#	#	#	#	#	#	0	1	1	0	#	0	#	#	#	#	#	#	#	#	1	1	0	0	#	#	#	#	1	#	#	#	#	0	#	1	1	#	#	0	0
[truncated: 10 more columns]
