# Supplementary material for: Canalization and Control in Automata Networks: Body Segmentation in Drosophila melanogaster
Source: PLOS journal article supplement (doi:10.1371/journal.pone.0055946), 2013-03-08
Supplement: S1 (10.1371/journal.pone.0055946.s001) [file journal.pone.0055946.s001]

## 1 Notation

| Symbol                                            | Name                                                            | Context  | Description                                                                                                                                                                                                                                   |
|---------------------------------------------------|-----------------------------------------------------------------|----------|-----------------------------------------------------------------------------------------------------------------------------------------------------------------------------------------------------------------------------------------------|
| $x$                                               | Boolean Automaton                                               | Automata | Binary-state automaton                                                                                                                                                                                                                        |
| $k$                                               | Number of inputs of $x$                                         | Automata | How many inputs determine the transitions of an automaton $x$                                                                                                                                                                                 |
| $F$                                               | Look-up table (LUT) of $x$                                      | Automata | The transition function of $x$ represented as a LUT ( $2^k$ entries).                                                                                                                                                                         |
| $f_\alpha$                                        | LUT entry in $F$                                                | Automata | $k$ -tuple combination of input states i.e. <i>condition</i> and corresponding <i>transition</i>                                                                                                                                              |
| $c_\alpha$                                        | condition part in a LUT entry $f_\alpha$                        | Automata | $k$ -tuple combination of input states i.e. <i>condition</i>                                                                                                                                                                                  |
| $s_\alpha$                                        | transition in a LUT entry $f_\alpha$                            | Automata | Boolean state prescribed as the transition in $f_\alpha$                                                                                                                                                                                      |
| $\mathcal{B}$                                     | Boolean network                                                 | Networks | A graph of $N$ automata with directed edges (source node is input of end node)                                                                                                                                                                |
| $X$                                               | set of automata in $\mathcal{B}$                                | Networks | set of Boolean automata that constitute a BN $\mathcal{B}$                                                                                                                                                                                    |
| $n$                                               | number of nodes in $\mathcal{B}$                                | Networks | $n =  X $                                                                                                                                                                                                                                     |
| $\mathbf{x}$                                      | network configuration                                           | Networks | collection of the states of all nodes in a BN $\mathcal{B}$                                                                                                                                                                                   |
| $X_i$                                             | set of inputs of node $x_i$ in $\mathcal{B}$                    | Networks | Set of input nodes of $x_i$                                                                                                                                                                                                                   |
| $k_i$                                             | in-degree of $x_i$                                              | Networks | Cardinality of $X_i$                                                                                                                                                                                                                          |
| $F_i$                                             | Look-up table of $x_i$                                          | Networks | Transition function represented as a LUT                                                                                                                                                                                                      |
| $f_{i:\alpha}$                                    | LUT entry in $F_i$                                              | Networks | Sub-indices $i$ and $\alpha$ , separated by ':', are used to specify node and entry.                                                                                                                                                          |
| $\mathcal{A}_i$                                   | An attractor of $\mathcal{B}$                                   | Networks | A specific (index $i$ ) fixed-point or periodic attractor of a BN $\mathcal{B}$ .                                                                                                                                                             |
| $\sigma(\mathbf{x}) \rightsquigarrow \mathcal{A}$ | Dynamic trajectory of $\mathbf{x}$ to $\mathcal{A}$             | Networks | This notation is used to represent that the trajectory of some configuration $\mathbf{x}$ is known to converge to $\mathcal{A}$                                                                                                               |
| $\#$                                              | Wildcard symbol                                                 | Wildcard | If this symbol appears in a condition, the variable it represents can be in any state.                                                                                                                                                        |
| $F'$                                              | wildcard-schema redescription of $F$                            | Wildcard | LUT where entries are wildcard schemata                                                                                                                                                                                                       |
| $f'_v$                                            | a wildcard schema in $F'$                                       | Wildcard | An entry in $F'$ is like an entry in $F$ but its condition part can have wildcard symbols.                                                                                                                                                    |
| $\Upsilon_v$                                      | Entries $f_\alpha \in F$ in $f'_v$                              | Wildcard | The set of original LUT entries in $F$ redescribed by a single wildcard schema $\Upsilon_v \equiv \{f_\alpha : f_\alpha \rightsquigarrow f'_v\}$                                                                                              |
| $\circ_m$                                         | Position-free symbol                                            | 2-Symbol | If a variable in the condition part of a schema is marked with this symbol, it can exchange places with any other variable in the same schema marked with the same symbol. Index $m$ used to distinguish subsets of identically-marked inputs |
| $\beta$                                           | Depth of search for two-symbol schemata                         | 2-Symbol | Defines the minimum number of wildcard schemata in a two-symbol redescription.                                                                                                                                                                |
| $F''$                                             | 2-symbol redescription of $F$                                   | 2-Symbol | LUT where entries are two-symbol schemata                                                                                                                                                                                                     |
| $f''_\theta$                                      | a 2-symbol schema in $F''$                                      | 2-Symbol | An entry in $F''$ is like an entry in $F$ but its condition part can have wildcard and position-free symbols.                                                                                                                                 |
| $\Theta_\theta$                                   | Entries $f_\alpha \in F : f_\alpha \rightsquigarrow f''_\theta$ | 2-Symbol | The set of original LUT entries in $F$ redescribed by a single 2-symbol schema $\Theta_\theta \equiv \{f_\alpha : f_\alpha \rightsquigarrow f''_\theta\}$                                                                                     |
| $\Theta'_\theta$                                  | Schemata $f'_v \in F' : f'_v \rightsquigarrow f''_\theta$       | 2-Symbol | The set of wildcard schemata in $F'$ redescribed by a single 2-symbol schema $\Theta'_\theta \equiv \{f'_v : f'_v \rightsquigarrow f''_\theta\}$                                                                                              |
| $X_\ell$                                          | set of literal inputs in a schema $f''$                         | 2-Symbol | The variables in the condition part of schema $f''$ that are specified in a Boolean state (not wildcard)                                                                                                                                      |
| $\eta_\ell$                                       | size of literal-input set in a schema $f''$                     | 2-Symbol | $\eta_\ell =  X_\ell $                                                                                                                                                                                                                        |
| $X_\ell^s$                                        | state- $s$ literal inputs in $f''$                              | 2-Symbol | Subset $X_\ell^s \subset X_\ell$ of literal inputs in a specific state $s : s \in \{0, 1\}$                                                                                                                                                   |
| $X_g$                                             | group-invariant input in a schema $f''$                         | 2-Symbol | The set variables in the condition part of schema $f''$ that are marked with an identical position-free symbol, in every state they can take                                                                                                  |
| $X_g^s$                                           | elements of $X_g$ in state $s$                                  | 2-Symbol | This notation is used to refer to the members of a group-invariant input instantiated in a specific state $s$ , that is $X_g^s = \{\forall x_i \in X_g \wedge x_i = s\}$                                                                      |
| $\eta$                                            | number of group-invariant inputs in $f''$                       | 2-Symbol | Number of subsets of inputs marked with a distinct position-free symbol                                                                                                                                                                       |
| $n_g$                                             | size of a single group-invariant input $g$ in $f''$             | 2-Symbol | Number of inputs marked with the position-free symbol in $g$ .                                                                                                                                                                                |
| $n_g^s$                                           | a sub-constraint in $X_g$ on state $s \in \{0, 1\}$             | 2-Symbol | specifies a group-invariant constraint in the set $X_g$ , at least $n_g^s$ variables must be in state $s$                                                                                                                                     |

| Symbol                                         | Name                                                                                            | Context           | Description                                                                                                                                                                               |
|------------------------------------------------|-------------------------------------------------------------------------------------------------|-------------------|-------------------------------------------------------------------------------------------------------------------------------------------------------------------------------------------|
| $\tau$                                         | Threshold of a t-unit                                                                           | Canalizing Maps   | The firing activity threshold of a transition unit in the canalizing map of an automaton $x$                                                                                              |
| $\underline{k}_e(x)$                           | lower-bound effective connectivity of $x$                                                       | Automata control  | Smallest number of inputs that, on average, determine the transition of $x$ when the states of all its inputs are equi-probable                                                           |
| $\overline{k}_e(x)$                            | upper-bound effective connectivity of $x$                                                       | Automata control  | Maximum number of inputs that, on average, are needed to determine the transition of $x$ when the states of all its inputs are equi-probable                                              |
| $k_r(x)$                                       | input redundancy in $x$                                                                         | Automata control  | $k_r(x) = k(x) - k_e(x)$                                                                                                                                                                  |
| $\underline{k}_s(x)$                           | lower-bound input symmetry of $x$                                                               | Automata control  | Smallest number of inputs with which, on average, an input can 'switch places with' to determine the transition of $x$ when the states of all its inputs are equi-probable                |
| $\overline{k}_s(x)$                            | upper-bound input symmetry of $x$                                                               | Automata control  | Largest number of inputs with which, on average, an input can 'switch places with' to determine the transition of $x$ when the states of all its inputs are equi-probable                 |
| $\hat{x}$                                      | partial configuration                                                                           | dynamic unfolding | A configuration of the BN where a subset of nodes is specified (in a Boolean state) while other nodes are <i>unknown</i>                                                                  |
| $\sigma(\hat{x}) \rightsquigarrow \mathcal{P}$ | dynamics from $\hat{x}$ leads to outcome $\mathcal{P}$                                          | dynamic unfolding | Dynamic trajectory from $\hat{x}$ ends in outcome pattern $\mathcal{P}$ (which can be a full attractor, or a partially specified steady-state configuration).                             |
| $\mathcal{P}$                                  | target outcome                                                                                  | Minimal Configs.  | A target pattern comprises any configurations that share some property of interest. It can contain a single attractor, or a set of outcome patterns.                                      |
| $x'$                                           | minimal configuration                                                                           | Minimal Configs.  | A configuration of the BN where a subset of nodes is specified (in a Boolean state) while other nodes are <i>unknown</i> such that $\sigma(x') \rightsquigarrow \mathcal{P}$              |
| $\ X'\ $ or $\ X''\ $                          | Number of configurations $X$ redescribed by a set of MCs                                        | Minimal Configs.  | The cardinality $ X $ of the set of configurations redescribed by a set of MCs may be counted exactly, or sampled.                                                                        |
| $\sigma(x') \rightsquigarrow \mathcal{P}$      | input-output relationship between a MC $x'$ and the target pattern it unfolds to, $\mathcal{P}$ | Minimal Configs.  | Dynamic trajectory of a minimal configuration $x'$ ends in target pattern $\mathcal{P}$ (this can be a single (full or partial) configuration, or a set of these that defines a pattern). |
